# Supplementary material for: Innate lymphoid type 2 cells sustain visceral adipose tissue eosinophils and alternatively activated macrophages
Source: PubMed Central journal article supplement — J Exp Med. 2013 Mar 11;210(3):535–49. doi: 10.1084/jem.20121964 (PMC3600903; doi:10.1084/jem.20121964), 2013-03-11
Supplement: supp_jem.20121964_JEM_20121964_sm.pdf [file supp_jem.20121964_JEM_20121964_sm.pdf]

**Representative CD4+ T-cell, ILC2, and IL-13+ subsets Gating Scheme**

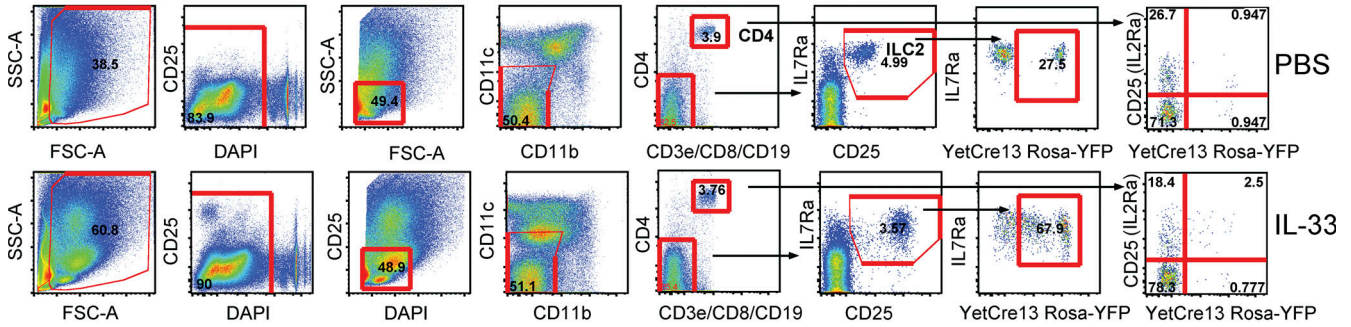

**Representative Eosinophil Gating Scheme**

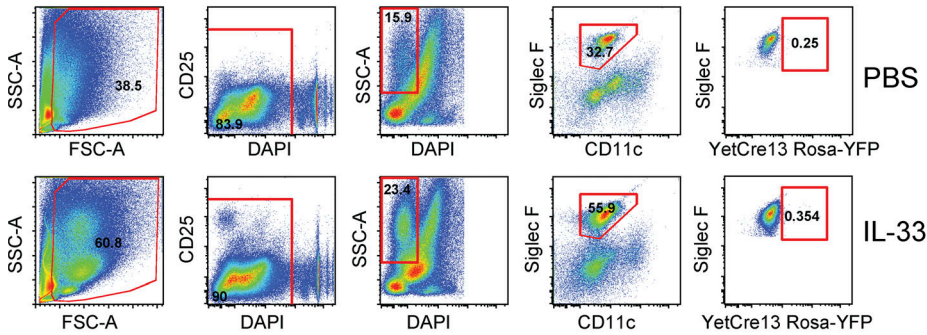

**Representative Yarg+ Alternatively Activated Macrophage (AAM) Gating Scheme**

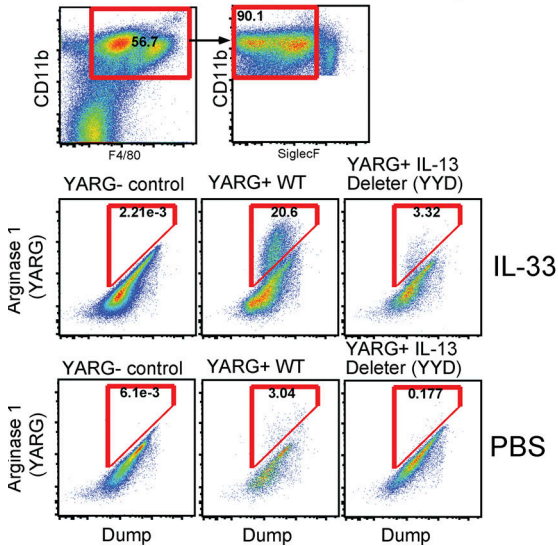

**Figure S1. Representative gating scheme for VAT flow cytometric phenotyping.** The gating strategy is shown for CD4+ T cells, ILC2s, eosinophils, total macrophages, and YARG+ AAMs. Gating is shown with and without IL-33 administration 24 h before.

**Representative VAT lymphocyte gating scheme**

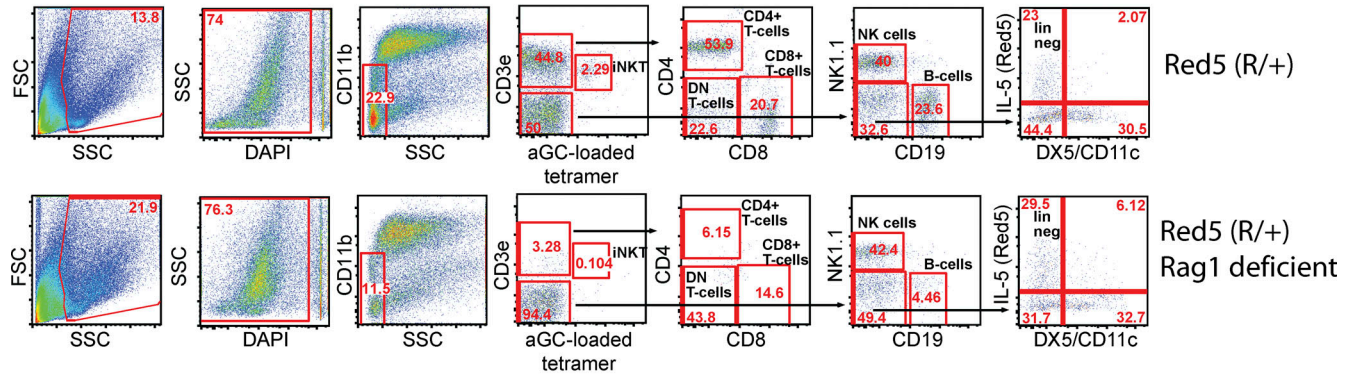

**Representative VAT IL-5+ (Red5+) cells, 7 days post IL-33 or PBS control**

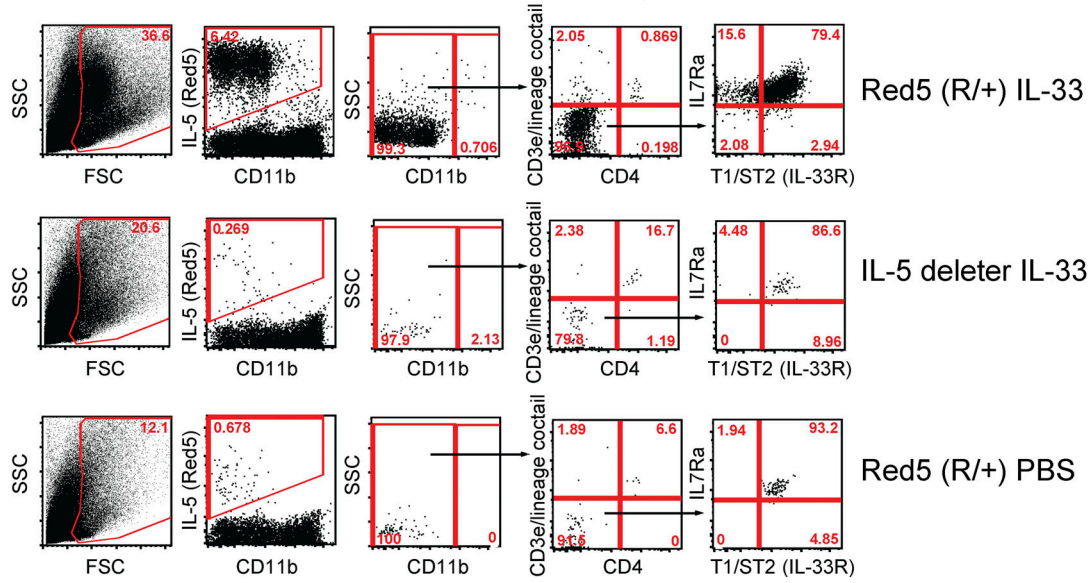

Figure S2. Representative gating scheme for total homeostatic VAT lymphoid populations and IL-5<sup>+</sup> (Red5<sup>+</sup>) cell populations after IL-33 administration.
